# Supplementary material for: Yarrowia lipolytica: a beneficious yeast in biotechnology as a rare opportunistic fungal pathogen: a minireview
Source: PubMed Central journal article supplement (PMC6302869; doi:10.1007/s11274-018-2583-8), 2018-12-21
Supplement: 11274_2018_2583_MOESM1_ESM.pdf [file 11274_2018_2583_MOESM1_ESM.pdf]

**Supplementary Table 1.** Characteristics of patients in whom *Yarrowia lipolytica* was isolated\*.

| No. | Clinical origin | Sex | Age   | Fungal disease                          | Underlying factors/diseases                                              | Coinfections                        | CT | CT removal | Outcome | Additional information                                  | Antibiotic therapy**                               | Reference                      |
|-----|-----------------|-----|-------|-----------------------------------------|--------------------------------------------------------------------------|-------------------------------------|----|------------|---------|---------------------------------------------------------|----------------------------------------------------|--------------------------------|
| 1.  | Blood culture   | F   | 57 yo | Fungemia<br>Catheter-related candidemia | Recurrent stomach ulcers, stroke, cerebral atrophy, fever, alcohol abuse | <i>C. albicans</i> in urine         | +  | +          | Cleared | -                                                       | KTC                                                | [Wehrspann & Fullbrandt, 1985] |
| 2.  | Blood culture   | M   | 61 yo | Fungemia<br>Catheter-related candidemia | Progressive dyspnea, cough, fever, pneumonitis                           | <i>C. albicans</i>                  | +  | +          | Cleared | -                                                       | FLC, then MFG                                      | [Lai et al., 2012]             |
| 3.  | Blood culture   | F   | 15 yo | Fungemia                                | Acute myelogenous leukemia                                               | <i>Stenotrophomonas maltophilia</i> | +  | +          | Cleared | -                                                       | FLU, ISP, AMP                                      | [Chang et al., 2001]           |
| 4.  | Blood culture   | M   | 2 yo  | Fungemia<br>Catheter-related candidemia | Fever, tubercular meningitis                                             | <i>M. tuberculosis</i>              | +  | +          | ND      | -                                                       | INH, RIF, PZA, STR, AMB                            | [Agarwal et al., 2008]         |
| 5.  | Blood culture   | F   | 18 yo | Fungemia<br>Catheter-related candidemia | Acute lymphoblastic leukemia                                             | -                                   | +  | +          | Died    | Patient received allogeneic bone marrow transplantation | SXT, AMB, ACV                                      | [D'Antonio et al., 2002]       |
| 6.  | Blood culture   | M   | 9 yo  | Fungemia<br>Catheter-related candidemia | Neuroblastoma, fever                                                     | -                                   | +  | +          | Cleared | Patient received autologous stem cell transplantation   | SCF, AMK, then MEM, TEC, FLC, and subsequently CAS | [Ozdemir et al., 2011]         |
| 7.  | Blood culture   | M   | 1 mo  | Fungemia                                | Necrotizing enterocolitis, malabsorption                                 | -                                   | +  | +          | Cleared | -                                                       | FLC                                                | [Shin et al., 2000]            |
| 8.  | Blood culture   | M   | 2 mo  | Fungemia                                | Bacterial infection (meningitis)                                         | group b streptococci                | -  | NA         | Cleared | -                                                       | Broad-spectrum antibiotics                         | [Shin et al., 2000]            |
| 9.  | Blood culture   | F   | 8 yo  | Fungemia                                | Acute myelogenous leukemia, chemotherapy                                 | -                                   | +  | -          | Cleared | -                                                       | FLC, then AMB                                      | [Shin et al., 2000]            |
| 10. | Blood culture   | M   | 14 yo | Fungemia                                | Acute myelogenous leukemia, chemotherapy                                 | -                                   | +  | -          | Cleared | -                                                       | FLC, then AMB                                      | [Shin et al., 2000]            |
| 11. | Blood culture   | M   | 4 yo  | Fungemia                                | Aplastic anemia, immunotherapy                                           | -                                   | +  | +          | Cleared | -                                                       | FLC                                                | [Shin et al., 2000]            |

|     |               |    |       |                                         |                                                                                                                |                                                                                                                                                                                                               |   |    |         |                                                         |                                                              |                              |
|-----|---------------|----|-------|-----------------------------------------|----------------------------------------------------------------------------------------------------------------|---------------------------------------------------------------------------------------------------------------------------------------------------------------------------------------------------------------|---|----|---------|---------------------------------------------------------|--------------------------------------------------------------|------------------------------|
| 12. | Blood culture | M  | 54 yo | Fungemia<br>Catheter-related candidemia | Suppurative thrombophlebitis, alcohol abuse, cholecystectomy for cholelithiasis and cholecystitis              | -                                                                                                                                                                                                             | + | +  | Cleared | -                                                       | Six different antibacterial agents in different combinations | [Walsh et al., 1989]         |
| 13. | Blood culture | M  | 46 yo | Fungemia                                | Enlarged liver, alcohol abuse                                                                                  | -                                                                                                                                                                                                             | - | NA | Died    | -                                                       | ND                                                           | [García-Martos et al., 1993] |
| 14. | Blood culture | F  | 40 yo | Fungemia<br>Catheter-related candidemia | Thrombocytopenia, tuberculosis,                                                                                | <i>C. albicans</i> , <i>C. glabrata</i> , <i>C. guilliermondii</i> and <i>Geotrichum</i> sp.                                                                                                                  | + | +  | Cleared | Patient received allogeneic bone marrow transplantation | AMB                                                          | [Ninin et al., 1997]         |
| 15. | Blood culture | ND | 12 yo | Fungemia<br>Catheter-related candidemia | Cystic pancreatic fibrosis                                                                                     | <i>C. glabrata</i>                                                                                                                                                                                            | + | +  | Cleared | -                                                       | CAZ, GEN, then MEM, and AMK, and subsequently change to VRC  | [Blanco et al., 2009]        |
| 16. | Blood culture | F  | 86 yo | Fungemia<br>Catheter-related candidemia | Recurrent urinary tract infections and vesical neoformation with peritoneal fibrosis, bilateral hydronephrosis | <i>Escherichia coli</i> , <i>Klebsiella pneumoniae</i> , <i>Enterobacter cloacae</i> , <i>Pseudomonas aeruginosa</i> , <i>A. baumannii</i> , <i>C. albicans</i> , <i>C. glabrata</i> and <i>C. tropicalis</i> | + | +  | Cleared | -                                                       | CAS                                                          | [Blanco et al., 2009]        |
| 17. | Blood culture | F  | 90 yo | Fungemia                                | General weakness and hydronephrosis, diarrhea symptoms                                                         | <i>E. coli</i> and methicillin-resistant coagulase-negative staphylococcus                                                                                                                                    | + | +  | Died    | Infection after raw beef ingestion                      | Antibiotic treatment and also FLC and then AMB               | [Kang et al., 2008]          |
| 18. | Blood culture | M  | 13 yo | Fungemia<br>Catheter-related candidemia | Acute Lymphoblastic Leukemia                                                                                   | -                                                                                                                                                                                                             | + | +  | Cleared | -                                                       | CFP, VAN, FLC                                                | [Ye et al., 2011]            |

|     |               |   |       |                                         |                                                   |                                                                |   |   |         |   |                                                            |                         |
|-----|---------------|---|-------|-----------------------------------------|---------------------------------------------------|----------------------------------------------------------------|---|---|---------|---|------------------------------------------------------------|-------------------------|
| 19. | Blood culture | M | 2 do  | Fungemia<br>Catheter-related candidemia | Intestinal obstruction and suspected sepsis       | <i>C. albicans</i>                                             | + | + | Cleared | - | CTX and FLC, then AMB, and subsequently AMB + CAS          | [Belet et al., 2006]    |
| 20. | Blood culture | F | 4 mo  | Fungemia<br>Catheter-related candidemia | Gastroesophageal reflux                           | methicillin-resistant<br><i>S. aureus</i> , <i>C. albicans</i> | + | + | Cleared | - | VAN, broad-spectrum antimicrobials and FLC, then AMB + CAS | [Belet et al., 2006]    |
| 21. | Blood culture | M | 21 yo | Fungemia<br>Catheter-related candidemia | Polytraumatism, Abdominal surgery                 | ND                                                             | + | + | Cleared | - | Broad-spectrum antibiotics, AMB, FLC                       | [Trabelsi et al., 2015] |
| 22. | Blood culture | M | 39 yo | Fungemia                                | Polytraumatism, Cerebral surgery                  | ND                                                             | + | + | Cleared | - | Broad-spectrum antibiotics                                 | [Trabelsi et al., 2015] |
| 23. | Blood culture | F | 60 yo | Fungemia                                | Ischemic cerebrovascular accident, Diabetes       | ND                                                             | + | + | Died    | - | Broad-spectrum antibiotics, FLC, AMB                       | [Trabelsi et al., 2015] |
| 24. | Blood culture | F | 48 yo | Fungemia                                | Polytraumatism, Cerebral surgery                  | ND                                                             | + | + | Cleared | - | Broad-spectrum antibiotics, FLC                            | [Trabelsi et al., 2015] |
| 25. | Blood culture | F | 32 yo | Fungemia                                | Status epilepticus, Diabetes                      | ND                                                             | + | - | Died    | - | Broad-spectrum antibiotics, FLC, AMB                       | [Trabelsi et al., 2015] |
| 26. | Blood culture | F | 15 yo | Fungemia                                | Menometrorrhagia, Acute anemia, Abdominal surgery | ND                                                             | + | + | Died    | - | Broad-spectrum antibiotics, FLC                            | [Trabelsi et al., 2015] |
| 27. | Blood culture | M | 78 yo | Fungemia                                | Chronic obstructive pulmonary disease             | ND                                                             | + | - | Cleared | - | Broad-spectrum antibiotics, FLC                            | [Trabelsi et al., 2015] |

|     |               |   |       |          |                                         |    |   |    |         |   |                                      |                         |
|-----|---------------|---|-------|----------|-----------------------------------------|----|---|----|---------|---|--------------------------------------|-------------------------|
| 28. | Blood culture | M | 50 yo | Fungemia | Rectosigmoid tumor, Abdominal surgery   | ND | + | -  | Died    | - | Broad-spectrum antibiotics, FLC, AMB | [Trabelsi et al., 2015] |
| 29. | Blood culture | M | 60 yo | Fungemia | Chronic renal failure, Diabetes         | ND | + | -  | Died    | - | Broad-spectrum antibiotics, AMB      | [Trabelsi et al., 2015] |
| 30. | Blood culture | M | 47 yo | Fungemia | Polytraumatism, Abdominal surgery       | ND | + | +  | Cleared | - | Broad-spectrum antibiotics, AMB      | [Trabelsi et al., 2015] |
| 31. | Blood culture | M | 27 yo | Fungemia | Thoracic traumatism, Abdominal surgery  | ND | + | +  | Cleared | - | Broad-spectrum antibiotics, FLC      | [Trabelsi et al., 2015] |
| 32. | Blood culture | M | 43 yo | Fungemia | Polytraumatism                          | ND | + | +  | Cleared | - | Broad-spectrum antibiotics, FLC      | [Trabelsi et al., 2015] |
| 33. | Blood culture | M | 52 yo | Fungemia | Renal failure, Cerebrovascular accident | ND | + | +  | Died    | - | Broad-spectrum antibiotics, AMB, FLC | [Trabelsi et al., 2015] |
| 34. | Blood culture | M | 68 yo | Fungemia | Chronic obstructive pulmonary disease   | ND | - | NA | Cleared | - | Broad-spectrum antibiotics, FLC      | [Trabelsi et al., 2015] |
| 35. | Blood culture | M | 36 yo | Fungemia | Polytraumatism, Multiple surgery        | ND | + | +  | Died    | - | Broad-spectrum antibiotics, AMB      | [Trabelsi et al., 2015] |
| 36. | Blood culture | M | 18 yo | Fungemia | Polytraumatism                          | ND | + | +  | Cleared | - | Broad-spectrum antibiotics, AMB      | [Trabelsi et al., 2015] |

|     |               |   |       |                                         |                                                |    |   |    |         |   |                                      |                         |
|-----|---------------|---|-------|-----------------------------------------|------------------------------------------------|----|---|----|---------|---|--------------------------------------|-------------------------|
| 37. | Blood culture | M | 51 yo | Fungemia                                | Polytraumatism                                 | ND | + | +  | Cleared | - | Broad-spectrum antibiotics, FLC, AMB | [Trabelsi et al., 2015] |
| 38. | Blood culture | M | 46 yo | Fungemia<br>Catheter-related candidemia | Polytraumatism, Multiple surgery               | ND | + | +  | Cleared | - | Broad-spectrum antibiotics, AMB      | [Trabelsi et al., 2015] |
| 39. | Blood culture | F | 62 yo | Fungemia                                | Acute pancreatitis                             | ND | + | ND | Died    | - | Broad-spectrum antibiotics, AMB      | [Trabelsi et al., 2015] |
| 40. | Blood culture | M | 20 yo | Fungemia                                | Polytraumatism                                 | ND | + | +  | Died    | - | Broad-spectrum antibiotics, FLC      | [Trabelsi et al., 2015] |
| 41. | Blood culture | M | 73 yo | Fungemia                                | Myocardial infarction, Renal failure, Diabetes | ND | + | ND | Died    | - | Broad-spectrum antibiotics           | [Trabelsi et al., 2015] |
| 42. | Blood culture | M | 74 yo | Fungemia                                | Polytraumatism, Diabetes                       | ND | + | +  | Died    | - | Broad-spectrum antibiotics, FLC, AMB | [Trabelsi et al., 2015] |
| 43. | Blood culture | F | 14 yo | Fungemia                                | Status epilepticus                             | ND | + | +  | Cleared | - | Broad-spectrum antibiotics, FLC      | [Trabelsi et al., 2015] |
| 44. | Blood culture | M | 57 yo | Fungemia                                | Polytraumatism, Diabetes                       | ND | + | +  | Died    | - | Broad-spectrum antibiotics           | [Trabelsi et al., 2015] |
| 45. | Blood culture | F | 35 yo | Fungemia<br>Catheter-related candidemia | Post-operative shock, Surgery - cesarian       | ND | + | +  | Cleared | - | Broad-spectrum antibiotics, FLC      | [Trabelsi et al., 2015] |
| 46. | Blood culture | M | 16 yo | Fungemia                                | Polytraumatism, Multiple surgery               | ND | + | +  | Cleared | - | Broad-spectrum antibiotics, FLC, AMB | [Trabelsi et al., 2015] |

|     |               |   |       |                                         |                                                  |    |   |    |         |   |                                      |                         |
|-----|---------------|---|-------|-----------------------------------------|--------------------------------------------------|----|---|----|---------|---|--------------------------------------|-------------------------|
| 47. | Blood culture | F | 58 yo | Fungemia                                | Diabetes, Heart failure, Cardiomyopathy, Surgery | ND | + | +  | Died    | - | Broad-spectrum antibiotics, FLC, AMB | [Trabelsi et al., 2015] |
| 48. | Blood culture | M | 50 yo | Fungemia                                | Guillain-Barre syndrome, Pneumopathy             | ND | + | +  | Died    | - | Broad-spectrum antibiotics           | [Trabelsi et al., 2015] |
| 49. | Blood culture | M | 36 yo | Fungemia                                | Polytraumatism                                   | ND | + | ND | Cleared | - | Broad-spectrum antibiotics, AMB      | [Trabelsi et al., 2015] |
| 50. | Blood culture | F | 45 yo | Fungemia<br>Catheter-related candidemia | Pneumonia                                        | ND | + | +  | Died    | - | Broad-spectrum antibiotics, AMB      | [Trabelsi et al., 2015] |
| 51. | Blood culture | M | 21 yo | Fungemia                                | Polytraumatism                                   | ND | + | ND | Cleared | - | Broad-spectrum antibiotics, AMB      | [Trabelsi et al., 2015] |
| 52. | Blood culture | M | 61 yo | Fungemia<br>Catheter-related candidemia | Polytraumatism                                   | ND | + | +  | Cleared | - | Broad-spectrum antibiotics, AMB      | [Trabelsi et al., 2015] |
| 53. | Blood culture | M | 26 yo | Fungemia                                | Polytraumatism                                   | ND | + | +  | Cleared | - | Broad-spectrum antibiotics           | [Trabelsi et al., 2015] |
| 54. | Blood culture | M | 78 yo | Fungemia                                | Polytraumatism, Abdominal surgery                | ND | + | ND | Died    | - | Broad-spectrum antibiotics           | [Trabelsi et al., 2015] |
| 55. | Blood culture | M | 27 yo | Fungemia                                | Polytraumatism                                   | ND | + | +  | Cleared | - | Broad-spectrum antibiotics, AMB      | [Trabelsi et al., 2015] |
| 56. | Blood culture | M | 83 yo | Fungemia<br>Catheter-related candidemia | Thoracic traumatism, Heart failure               | ND | + | ND | Died    | - | Broad-spectrum antibiotics           | [Trabelsi et al., 2015] |

|     |               |   |       |                                         |                                             |    |   |    |         |   |                                      |                         |
|-----|---------------|---|-------|-----------------------------------------|---------------------------------------------|----|---|----|---------|---|--------------------------------------|-------------------------|
| 57. | Blood culture | M | 42 yo | Fungemia                                | Polytraumatism, Diabetes                    | ND | + | +  | Cleared | - | Broad-spectrum antibiotics, AMB      | [Trabelsi et al., 2015] |
| 58. | Blood culture | M | 30 yo | Fungemia<br>Catheter-related candidemia | Polytraumatism, Diabetes                    | ND | + | +  | Cleared | - | Broad-spectrum antibiotics           | [Trabelsi et al., 2015] |
| 59. | Blood culture | M | 45 yo | Fungemia                                | Polytraumatism, Diabetes                    | ND | + | ND | Died    | - | Broad-spectrum antibiotics, FLC, AMB | [Trabelsi et al., 2015] |
| 60. | Blood culture | M | 50 yo | Fungemia                                | Pharyngeal cancer                           | ND | - | -  | Died    | - | Broad-spectrum antibiotics, AMB      | [Trabelsi et al., 2015] |
| 61. | Blood culture | M | 61 yo | Fungemia                                | Acute colitis, Diabetes, Abdominal surgery  | ND | + | ND | Cleared | - | Broad-spectrum antibiotics, FLC      | [Trabelsi et al., 2015] |
| 62. | Blood culture | M | 52 yo | Fungemia                                | Hemorrhagic rectocolitis, Abdominal surgery | ND | + | ND | Died    | - | Broad-spectrum antibiotics, AMB      | [Trabelsi et al., 2015] |
| 63. | Blood culture | F | 36 yo | Fungemia                                | Chronic renal failure, Diabetes             | ND | + | +  | Cleared | - | Broad-spectrum antibiotics           | [Trabelsi et al., 2015] |
| 64. | Blood culture | F | 25 yo | Fungemia                                | Diabetes, Epilepsy, Caustic oesophagitis    | ND | + | +  | Died    | - | Broad-spectrum antibiotics, AMB      | [Trabelsi et al., 2015] |
| 65. | Blood culture | M | 38 yo | Fungemia                                | Thoracic and abdominal trauma, Diabetes     | ND | + | +  | Died    | - | Broad-spectrum antibiotics, AMB      | [Trabelsi et al., 2015] |
| 66. | Blood culture | M | 29 yo | Fungemia                                | Abdominal trauma, Abdominal Surgery         | ND | + | ND | Died    | - | Broad-spectrum antibiotics, AMB, FLC | [Trabelsi et al., 2015] |

|     |               |    |       |                                           |                                                         |    |    |    |         |   |                                         |                         |
|-----|---------------|----|-------|-------------------------------------------|---------------------------------------------------------|----|----|----|---------|---|-----------------------------------------|-------------------------|
| 67. | Blood culture | M  | 30 yo | Fungemia<br>Catheter-related candidemia   | Thoracic trauma, Surgery                                | ND | +  | +  | Died    | - | Broad-spectrum antibiotics              | [Trabelsi et al., 2015] |
| 68. | Blood culture | M  | 46 yo | Fungemia                                  | Diabetes,<br>Bronchopneumopathy                         | ND | +  | ND | Died    | - | Broad-spectrum antibiotics,<br>FLC      | [Trabelsi et al., 2015] |
| 69. | Blood culture | M  | 32 yo | Fungemia                                  | Nosocomial pneumopathy                                  | ND | +  | +  | ND      | - | Broad-spectrum antibiotics,<br>AMB      | [Trabelsi et al., 2015] |
| 70. | Blood culture | M  | 34 yo | Fungemia                                  | Polytraumatism                                          | ND | +  | ND | Cleared | - | Broad-spectrum antibiotics,<br>FLC      | [Trabelsi et al., 2015] |
| 71. | Blood culture | M  | 64 yo | Fungemia                                  | Hemorrhagic, Cerebrovascular accident, Cerebral surgery | ND | +  | +  | Died    | - | Broad-spectrum antibiotics,<br>AMB, FLC | [Trabelsi et al., 2015] |
| 72. | Blood culture | M  | 60 yo | Fungemia                                  | Acute pulmonary edema,<br>Diabetes                      | ND | +  | +  | Cleared | - | Broad-spectrum antibiotics,<br>FLC      | [Trabelsi et al., 2015] |
| 73. | Blood culture | M  | 4 yo  | Fungemia                                  | Soda intoxication, Caustic oesophagitis                 | ND | +  | +  | Died    | - | Broad-spectrum antibiotics              | [Trabelsi et al., 2015] |
| 74. | Blood culture | M  | 40 yo | Fungemia                                  | Polytraumatism                                          | ND | +  | +  | Died    | - | Broad-spectrum antibiotics              | [Trabelsi et al., 2015] |
| 75. | Blood culture | M  | 18 yo | Fungemia                                  | Polytraumatism                                          | ND | +  | +  | Cleared | - | Broad-spectrum antibiotics,<br>AMB      | [Trabelsi et al., 2015] |
| 76. | Breast tissue | ND | ND    | Postivie culture for <i>Y. lipolytica</i> | Breast carcinoma                                        | ND | ND | ND | ND      | - | -                                       | [Irby et al., 2014]     |



|     |                              |    |       |                                          |                                                         |                                                                                                          |    |    |         |   |                             |                                |
|-----|------------------------------|----|-------|------------------------------------------|---------------------------------------------------------|----------------------------------------------------------------------------------------------------------|----|----|---------|---|-----------------------------|--------------------------------|
| 77. | Bronchoalveolar lavage fluid | ND | ND    | Postive culture for <i>Y. lipolytica</i> | Breast carcinoma                                        | ND                                                                                                       | ND | ND | ND      | - | -                           | [Irby et al., 2014]            |
| 78. | Duodenal mass                | ND | ND    | Postive culture for <i>Y. lipolytica</i> | Benign granuloma                                        | ND                                                                                                       | ND | ND | ND      | - | -                           | [Irby et al., 2014]            |
| 79. | Eye                          | ND | ND    | Ocular candidiasis                       | ND                                                      | ND                                                                                                       | ND | ND | ND      | - | ND                          | [Nitzulescu & Niculescu, 1976] |
| 80. | Eye                          | ND | ND    | Ocular candidiasis                       | ND                                                      | ND                                                                                                       | ND | ND | ND      | - | ND                          | [Nitzulescu & Niculescu, 1976] |
| 81. | Eye                          | ND | ND    | Ocular candidiasis                       | ND                                                      | ND                                                                                                       | ND | ND | ND      | - | ND                          | [Nitzulescu & Niculescu, 1976] |
| 82. | Eye                          | F  | 57 yo | Acute keratitis                          | Corneal ulcer with persistent epidefect of the left eye | -                                                                                                        | -  | -  | Cleared | - | NAT, FML                    | [Lai et al., 2012]             |
| 83. | Intraabdominal abscess       | F  | 42 yo | Fungemia                                 | Liver transplantation                                   | <i>Enterococcus faecium</i> , viridans group streptococci, methicillin-resistant <i>S. epidermidis</i> , | +  | +  | Died    | - | DAP, DOR, MFG, and then AMB | [Mazumder et al., 2015]        |
| 84. | Lung                         | ND | ND    | Postive culture for <i>Y. lipolytica</i> | Melanoma                                                | ND                                                                                                       | ND | ND | ND      | - | -                           | [Irby et al., 2014]            |
| 85. | Lung                         | ND | ND    | Postive culture for <i>Y. lipolytica</i> | Benign granuloma                                        | ND                                                                                                       | ND | ND | ND      | - | -                           | [Irby et al., 2014]            |
| 86. | Lung                         | ND | ND    | Postive culture for <i>Y. lipolytica</i> | Necrotizing granuloma                                   | ND                                                                                                       | ND | ND | ND      | - | -                           | [Irby et al., 2014]            |
| 87. | Lung                         | ND | ND    | Postive culture for <i>Y. lipolytica</i> | Benign granuloma                                        | ND                                                                                                       | ND | ND | ND      | - | -                           | [Irby et al., 2014]            |
| 88. | Lung                         | ND | ND    | Postive culture for <i>Y. lipolytica</i> | Non-small-cell lung carcinoma                           | ND                                                                                                       | ND | ND | ND      | - | -                           | [Irby et al., 2014]            |
| 89. | Lung                         | ND | ND    | Postive culture for <i>Y. lipolytica</i> | Cryptogenic organizing pneumonia                        | ND                                                                                                       | ND | ND | ND      | - | -                           | [Irby et al., 2014]            |
| 90. | Lung                         | ND | ND    | Postive culture for <i>Y. lipolytica</i> | Benign granuloma                                        | ND                                                                                                       | ND | ND | ND      | - | -                           | [Irby et al., 2014]            |
| 91. | Lung                         | ND | ND    | Postive culture for <i>Y. lipolytica</i> | Synovial sarcoma                                        | ND                                                                                                       | ND | ND | ND      | - | -                           | [Irby et al., 2014]            |

|      |                  |    |       |                                           |                                                                                                                |                                 |    |    |                       |   |                    |                      |
|------|------------------|----|-------|-------------------------------------------|----------------------------------------------------------------------------------------------------------------|---------------------------------|----|----|-----------------------|---|--------------------|----------------------|
| 92.  | Lung             | ND | ND    | Postivie culture for <i>Y. lipolytica</i> | Renal cell carcinoma, Benign granuloma                                                                         | ND                              | ND | ND | ND                    | - | -                  | [Irby et al., 2014]  |
| 93.  | Lung             | ND | ND    | Postivie culture for <i>Y. lipolytica</i> | Benign granuloma                                                                                               | ND                              | ND | ND | ND                    | - | -                  | [Irby et al., 2014]  |
| 94.  | Lung             | ND | ND    | Postivie culture for <i>Y. lipolytica</i> | Benign granuloma                                                                                               | ND                              | ND | ND | ND                    | - | -                  | [Irby et al., 2014]  |
| 95.  | Lung             | ND | ND    | Postivie culture for <i>Y. lipolytica</i> | None                                                                                                           | <i>M. tuberculosis</i>          | ND | ND | ND                    | - | -                  | [Irby et al., 2014]  |
| 96.  | Lung             | ND | ND    | Postivie culture for <i>Y. lipolytica</i> | None                                                                                                           | ND                              | ND | ND | ND                    | - | -                  | [Irby et al., 2014]  |
| 97.  | Lung             | ND | ND    | Postivie culture for <i>Y. lipolytica</i> | Non-small-cell lung carcinoma                                                                                  | ND                              | ND | ND | ND                    | - | -                  | [Irby et al., 2014]  |
| 98.  | Lung             | ND | ND    | Postivie culture for <i>Y. lipolytica</i> | Chronic myelogenous leukemia, Pulmonary alveolar proteinosis                                                   | ND                              | ND | ND | ND                    | - | -                  | [Irby et al., 2014]  |
| 99.  | Lung             | ND | ND    | Postivie culture for <i>Y. lipolytica</i> | Melanoma                                                                                                       | ND                              | ND | ND | ND                    | - | -                  | [Irby et al., 2014]  |
| 100. | Lung             | ND | ND    | Postivie culture for <i>Y. lipolytica</i> | None                                                                                                           | ND                              | ND | ND | ND                    | - | -                  | [Irby et al., 2014]  |
| 101. | Mesenteric mass  | ND | ND    | Postivie culture for <i>Y. lipolytica</i> | Benign cystic mass                                                                                             | ND                              | ND | ND | ND                    | - | -                  | [Irby et al., 2014]  |
| 102. | Sinus aspirate   | F  | 46 yo | Localized infection                       | Chronic sinusitis                                                                                              | <i>S. aureus, P. aeruginosa</i> | -  | -  | Cleared               | - | KTC                | [Walsh et al., 1989] |
| 103. | Skin             | F  | 63 yo | Cutaneous infection                       | Chronic obstructive pulmonary disease and hypertension                                                         | -                               | -  | -  | Cleared               | - | CIP, ITC, then FLC | [Boyd et al., 2017]  |
| 104. | Skin             | M  | 39 yo | Granuloma                                 | Surgical operation, therapies including antibiotics, anti-tuberculosis agents, prednisone and cyclophosphamide | -                               | -  | -  | ND                    | - | ND                 | [Zheng et al., 2009] |
| 105. | Skin             | ND | ND    | Postivie culture for <i>Y. lipolytica</i> | Meningioma                                                                                                     | ND                              | ND | ND | ND                    | - | -                  | [Irby et al., 2014]  |
| 106. | Skin             | ND | ND    | Postivie culture for <i>Y. lipolytica</i> | Acute myelogenous leukemia                                                                                     | ND                              | ND | ND | ND                    | - | -                  | [Irby et al., 2014]  |
| 107. | Stool            | ND | ND    | Postivie culture for <i>Y. lipolytica</i> | Acute myelogenous leukemia                                                                                     | ND                              | ND | ND | ND                    | - | -                  | [Irby et al., 2014]  |
| 108. | Ulceration wound | F  | 46 yo | Soft-tissue infection                     | Adrenal insufficiency and a chronic ulcer lesion over the right knee                                           | -                               | -  | -  | Cleared after surgery | - | -                  | [Lai et al., 2012]   |

|      |        |   |       |                                           |                                                                                      |                  |    |    |         |                                             |                    |                            |
|------|--------|---|-------|-------------------------------------------|--------------------------------------------------------------------------------------|------------------|----|----|---------|---------------------------------------------|--------------------|----------------------------|
| 109. | Vagina | F | 25 yo | Vaginal colonisation                      | Cervicitis with squamous metaplasia                                                  | -                | -  | -  | Cleared | -                                           | -                  | [Rajagopalan et al., 1996] |
| 110. | Wound  | M | 73 yo | Postivie culture for <i>Y. lipolytica</i> | The patient was bitten by rats/Necrosis of the left temporalis area and the left ear | <i>Mucor</i> sp. | ND | ND | ND      | The patient was transferred to hospice care | CAZ, OXA, MTZ, AMB | [Levy et al., 2003]        |

\*ND - No Data; NA - Not Applicable; yo - years old; mo - months old; do - days old; + (Yes); - (No); F - Female; M - Male; CT - Catheter

\*\*Antimicrobial agents abbreviations: ACV - Acyclovir, AMB - Amphotericin B, AMK - Amikacin, AMP - Ampicillin, CAS - Caspofungin, CAZ - Ceftazidime, CFP - Cefoperazone, CIP - Ciprofloxacin, CTX - Cefotaxime, DAP - Daptomycin, DOR -

Doripenem, FLC - Fluconazole, FLU - Flucloxacillin, FML - Fluorometholone, GEN - Gentamicin, INH - Isoniazid, ISP - Isepamicin, ITC - Itraconazole, KTC - Ketoconazole, MEM - Meropenem, MFG - Micafungin, MTZ - Metronidazole, NAT - Natamycin,

OXA - Oxacillin, PZA - Pyrazinamide, RIF - Rifampicin, SCF - Cefoperazone-Sulbactam, STR - Streptomycin, SXT - Trimethoprim-Sulfamethoxazole, TEC - Teicoplanin, VAN - Vancomycin, VRC - Voriconazole
